# Supplementary material
Source: PubMed Central journal article supplement (PMC1257696)

A

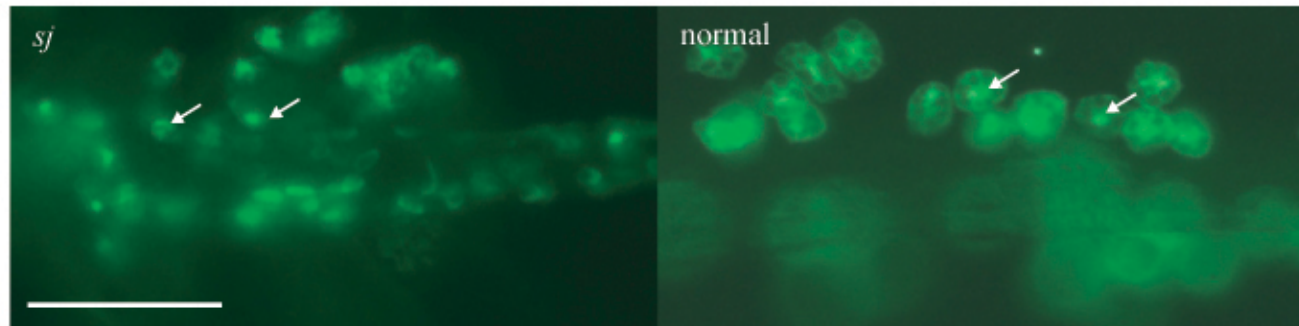

B

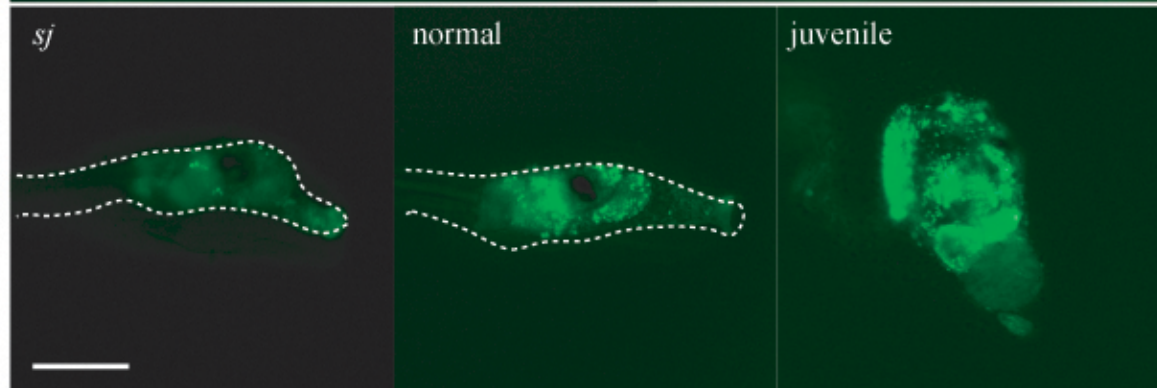

Supplement: pnas_0503640102_1.pdf [file pnas_0503640102_1.pdf]
